# Supplementary material
Source: PubMed Central journal article supplement (PMC3713211)
Supplement: supp_en.2013-1230_EN-13-1230_4_tables.pdf [file supp_en.2013-1230_EN-13-1230_4_tables.pdf]

Supplemental Table 1. Relative expression levels of miRNAs in the vHIPP for signal intensities &gt;500.

| miRNA ID          | 3 months  | SD       | 18 months | SD       |
|-------------------|-----------|----------|-----------|----------|
| rno-miR-125b-5p   | 34,341.65 | 190.56   | 34,760.82 | 1,482.79 |
| rno-miR-9         | 32,909.61 | 2,081.18 | 32,381.17 | 2,506.81 |
| rno-miR-128       | 27,876.06 | 1,107.70 | 28,176.53 | 1,685.54 |
| rno-miR-26a       | 24,813.59 | 1,360.06 | 26,766.85 | 2,572.05 |
| rno-miR-29a       | 24,057.18 | 1,577.98 | 26,291.62 | 1,226.79 |
| rno-let-7a        | 23,944.21 | 903.86   | 24,604.06 | 898.81   |
| rno-let-7c        | 21,202.86 | 1,226.29 | 22,438.28 | 2,015.58 |
| rno-miR-466b-1-3p | 21,058.12 | 613.42   | 22,049.90 | 2,000.16 |
| rno-miR-466c-3p   | 20,694.46 | 640.07   | 21,711.93 | 1,997.58 |
| rno-let-7f        | 20,650.72 | 770.76   | 20,742.31 | 496.03   |
| rno-let-7d        | 19,681.17 | 852.48   | 19,800.67 | 425.63   |
| rno-miR-124       | 19,229.34 | 1,834.44 | 20,647.81 | 1,863.24 |
| rno-miR-125a-5p   | 18,871.26 | 551.91   | 18,720.27 | 1,060.23 |
| rno-let-7b        | 18,103.40 | 697.79   | 18,807.75 | 1,271.20 |
| rno-miR-9-3p      | 16,643.50 | 507.91   | 16,344.03 | 1,026.59 |
| rno-miR-181a      | 16,614.26 | 2,103.60 | 17,709.98 | 2,168.72 |
| rno-miR-23b       | 14,564.76 | 918.67   | 15,226.70 | 1,208.60 |
| rno-miR-466b-2-3p | 14,243.83 | 545.93   | 14,634.29 | 855.41   |
| rno-miR-30c       | 13,619.99 | 616.15   | 13,515.59 | 931.21   |
| rno-miR-568       | 13,117.42 | 2,721.13 | 14,187.79 | 1,260.18 |
| rno-miR-127       | 13,061.83 | 1,301.06 | 13,601.27 | 1,691.24 |
| rno-miR-222       | 12,590.79 | 1,195.81 | 12,851.51 | 1,538.90 |
| rno-let-7i        | 12,423.18 | 456.28   | 12,754.82 | 671.90   |
| rno-miR-23a       | 12,276.15 | 750.73   | 12,905.68 | 1,058.59 |
| rno-miR-221       | 12,256.51 | 1,066.28 | 12,648.82 | 1,095.16 |
| rno-miR-434       | 12,123.25 | 656.28   | 11,298.41 | 840.31   |
| rno-miR-218a      | 12,068.14 | 871.84   | 11,456.06 | 1,878.60 |
| rno-let-7e        | 11,606.67 | 1,883.29 | 10,816.30 | 1,793.40 |
| rno-miR-30b-5p    | 9,586.42  | 2,327.54 | 7,666.24  | 2,674.44 |
| rno-miR-191       | 9,425.16  | 1,301.10 | 9,811.96  | 1,356.69 |
| rno-miR-103       | 9,396.41  | 1,326.92 | 9,719.01  | 1,353.51 |
| rno-miR-107       | 8,884.93  | 1,123.74 | 9,249.37  | 1,041.69 |
| rno-miR-29c       | 8,582.84  | 3,318.30 | 8,239.14  | 3,971.76 |
| rno-miR-129-2-3p  | 8,535.26  | 578.42   | 6,849.01  | 1,410.90 |
| rno-miR-24        | 7,822.16  | 1,300.19 | 9,088.86  | 1,445.06 |
| rno-miR-145       | 7,734.93  | 1,165.00 | 7,897.21  | 2,686.78 |
| rno-miR-483-3p    | 7,277.34  | 695.32   | 6,729.23  | 745.85   |
| rno-miR-126       | 6,249.22  | 580.27   | 6,782.56  | 682.13   |
| rno-miR-7a        | 6,219.45  | 294.77   | 4,543.15  | 988.46   |
| rno-miR-132       | 5,906.47  | 743.72   | 6,075.71  | 767.77   |
| rno-miR-99a       | 5,695.38  | 354.08   | 5,086.51  | 600.89   |
| rno-miR-99b       | 5,210.52  | 667.14   | 5,230.16  | 997.79   |
| rno-miR-138       | 5,184.95  | 1,088.97 | 5,704.49  | 1,478.11 |
| rno-miR-100       | 4,954.46  | 349.08   | 4,253.17  | 867.25   |
| rno-miR-16        | 4,875.97  | 531.25   | 5,533.96  | 382.90   |
| rno-miR-139-5p    | 4,718.80  | 320.37   | 4,679.63  | 365.13   |
| rno-miR-210-3p    | 4,593.95  | 1,891.41 | 4,813.84  | 1,965.21 |
| rno-miR-150       | 4,512.16  | 340.74   | 3,601.62  | 500.51   |
| rno-miR-30a       | 4,328.87  | 211.18   | 4,574.04  | 525.81   |
| rno-miR-3574      | 4,315.79  | 1,034.57 | 4,481.63  | 1,104.75 |
| rno-miR-27b       | 4,019.85  | 441.45   | 4,526.84  | 268.33   |
| rno-miR-30d       | 4,010.12  | 375.88   | 3,942.34  | 296.88   |
| rno-miR-196c-3p   | 3,955.92  | 1,435.39 | 3,352.75  | 468.68   |
| rno-miR-352       | 3,935.83  | 927.01   | 3,359.49  | 883.43   |
| rno-miR-328a-3p   | 3,872.33  | 5,457.75 | 1,594.60  | 1,402.69 |
| rno-miR-26b       | 3,598.88  | 2,264.85 | 3,159.58  | 1,565.08 |
| rno-miR-22        | 3,539.82  | 489.40   | 3,808.50  | 442.06   |
| rno-miR-758-3p    | 3,423.71  | 1,723.88 | 3,011.83  | 1,448.96 |
| rno-miR-487b      | 3,348.78  | 449.08   | 3,108.01  | 580.35   |
| rno-miR-29b       | 3,296.24  | 755.74   | 3,871.07  | 1,700.23 |
| rno-miR-181b      | 3,189.23  | 255.39   | 3,561.98  | 209.21   |
| rno-miR-185       | 3,113.13  | 628.61   | 3,383.23  | 665.07   |
| rno-miR-181c      | 3,045.02  | 534.67   | 2,373.84  | 730.24   |
| rno-miR-1224      | 3,009.32  | 761.02   | 2,829.29  | 719.29   |

| miRNA ID         | 3 months | SD       | 18 months | SD       |
|------------------|----------|----------|-----------|----------|
| rno-miR-361      | 2,939.77 | 532.74   | 3,317.51  | 653.90   |
| rno-miR-27a      | 2,919.72 | 249.94   | 3,177.91  | 444.47   |
| rno-miR-143      | 2,851.84 | 564.18   | 3,188.61  | 1,181.93 |
| rno-miR-672      | 2,841.16 | 429.92   | 1,761.04  | 829.65   |
| rno-miR-137      | 2,769.36 | 381.15   | 2,610.83  | 751.86   |
| rno-miR-98       | 2,720.99 | 2,273.85 | 1,883.84  | 1,503.19 |
| rno-miR-129-1-3p | 2,616.90 | 751.10   | 1,841.97  | 501.07   |
| rno-miR-195      | 2,605.78 | 313.29   | 2,705.06  | 514.58   |
| rno-miR-384-5p   | 2,600.05 | 242.51   | 2,513.06  | 354.05   |
| rno-miR-328a     | 2,550.43 | 881.48   | 2,820.08  | 1,072.09 |
| rno-miR-494      | 2,406.82 | 2,367.09 | 1,826.73  | 1,481.71 |
| rno-miR-151      | 2,356.54 | 504.99   | 2,505.58  | 522.37   |
| rno-miR-34c-3p   | 2,275.67 | 1,810.69 | 1,975.78  | 865.43   |
| rno-miR-329      | 2,209.73 | 221.37   | 1,728.78  | 261.33   |
| rno-miR-214      | 2,208.55 | 307.79   | 2,064.27  | 296.67   |
| rno-miR-382      | 2,185.59 | 116.17   | 2,181.51  | 69.46    |
| rno-miR-433      | 1,897.27 | 393.85   | 1,913.86  | 556.95   |
| rno-miR-320      | 1,855.48 | 380.47   | 2,235.85  | 594.01   |
| rno-miR-331      | 1,711.08 | 339.67   | 1,675.98  | 445.64   |
| rno-miR-92b      | 1,670.25 | 388.01   | 2,081.03  | 846.70   |
| rno-miR-539      | 1,566.49 | 373.48   | 1,461.20  | 334.67   |
| rno-miR-379      | 1,559.86 | 212.78   | 1,627.67  | 192.57   |
| rno-miR-495      | 1,492.57 | 73.66    | 1,325.06  | 110.56   |
| rno-miR-219-2-3p | 1,482.06 | 186.32   | 1,904.20  | 143.80   |
| rno-miR-324-5p   | 1,470.32 | 403.38   | 1,702.36  | 540.24   |
| rno-miR-181d     | 1,385.93 | 458.58   | 1,220.55  | 652.80   |
| rno-miR-206      | 1,357.51 | 422.26   | 921.44    | 537.83   |
| rno-miR-3584-5p  | 1,231.98 | 837.89   | 1,005.04  | 282.69   |
| rno-miR-204      | 1,205.80 | 197.34   | 6,135.38  | 7,612.59 |
| rno-miR-485-3p   | 1,191.32 | 479.81   | 993.47    | 81.41    |
| rno-miR-30e      | 1,138.16 | 346.83   | 1,162.48  | 314.49   |
| rno-miR-140-3p   | 1,105.16 | 278.69   | 1,431.61  | 531.83   |
| rno-miR-376b-3p  | 1,104.01 | 172.43   | 968.70    | 141.34   |
| rno-miR-138-1-3p | 1,072.56 | 103.67   | 1,037.56  | 38.84    |
| rno-miR-32-3p    | 1,063.60 | 740.75   | 835.54    | 666.51   |
| rno-miR-344a-3p  | 1,041.23 | 362.87   | 1,133.65  | 438.88   |
| rno-miR-342-3p   | 1,015.36 | 135.97   | 872.45    | 95.67    |
| rno-miR-21       | 999.46   | 64.22    | 1,425.99  | 215.86   |
| rno-miR-674-5p   | 994.68   | 240.14   | 1,188.93  | 377.96   |
| rno-miR-346      | 946.58   | 263.77   | 1,012.38  | 344.42   |
| rno-miR-330-3p   | 874.43   | 315.67   | 1,152.24  | 409.60   |
| rno-let-7d-3p    | 839.47   | 152.25   | 902.23    | 155.76   |
| rno-miR-598-3p   | 833.40   | 114.32   | 819.84    | 120.33   |
| rno-miR-25       | 796.10   | 116.73   | 830.13    | 62.74    |
| rno-miR-423-3p   | 777.42   | 108.70   | 886.79    | 234.11   |
| rno-miR-31       | 755.55   | 225.32   | 985.52    | 326.48   |
| rno-miR-378      | 755.23   | 189.39   | 840.13    | 229.35   |
| rno-miR-146b     | 750.89   | 67.62    | 801.94    | 154.61   |
| rno-miR-543-3p   | 748.70   | 82.25    | 705.85    | 136.15   |
| rno-miR-130a     | 743.51   | 39.94    | 817.87    | 224.54   |
| rno-miR-384-3p   | 731.31   | 497.14   | 645.31    | 530.35   |
| rno-miR-455-3p   | 716.33   | 107.10   | 734.69    | 175.10   |
| rno-miR-92a      | 708.45   | 47.19    | 668.54    | 52.27    |
| rno-miR-324-3p   | 705.40   | 223.42   | 826.41    | 277.77   |
| rno-miR-466b     | 687.56   | 483.23   | 516.83    | 425.41   |
| rno-miR-323      | 660.84   | 52.61    | 571.23    | 65.74    |
| rno-miR-154      | 605.40   | 100.60   | 608.43    | 51.69    |
| rno-miR-187      | 592.17   | 111.40   | 562.99    | 79.24    |
| rno-miR-667      | 588.43   | 107.63   | 529.69    | 55.29    |
| rno-miR-485      | 581.14   | 213.32   | 663.35    | 265.94   |
| rno-miR-101a     | 572.82   | 133.52   | 697.30    | 245.95   |
| rno-miR-409-3p   | 541.12   | 48.16    | 548.50    | 116.37   |
| rno-miR-129      | 537.24   | 43.22    | 543.53    | 67.16    |
| rno-miR-425      | 536.51   | 174.10   | 554.12    | 203.88   |
| rno-miR-504      | 530.26   | 108.94   | 511.37    | 133.86   |
| rno-miR-383      | 520.55   | 132.77   | 572.47    | 165.21   |
| rno-miR-708      | 512.52   | 123.60   | 610.63    | 134.12   |

Supplemental Table 2. Statistical analysis of miRNA expression levels in the dHIPP

| miRNA    | <u>Main Effect:</u><br>Treatment            | <u>Main Effect:</u><br>Age                  | <u>Interaction:</u><br>Treatment x Age      |
|----------|---------------------------------------------|---------------------------------------------|---------------------------------------------|
| Let-7i   | No                                          | Yes<br>( $F(1,16)=6.292$ ,<br>$p=0.023$ )   | No                                          |
| miR-7a   | Yes<br>( $F(1,15)=106.178$ ,<br>$p<0.001$ ) | Yes<br>( $F(1,15)=110.163$ ,<br>$p<0.001$ ) | Yes<br>( $F(1,15)=109.984$ ,<br>$p<0.001$ ) |
| miR-9    | Yes<br>( $F(1,15)=5.609$ ,<br>$p=0.032$ )   | Yes<br>( $F(1,15)=4.726$ ,<br>$p=0.046$ )   | No                                          |
| miR-9-3p | No                                          | Yes<br>( $F(1,15)=5.011$ ,<br>$p=0.041$ )   | No                                          |
| miR-125a | No                                          | No                                          | No                                          |
| miR-181a | No                                          | Yes<br>( $F(1,16)=32.893$ ,<br>$p<0.001$ )  | No                                          |
| miR-495  | No                                          | No                                          | No                                          |

Supplemental Table 3. Statistical analysis of miRNA expression levels in the PVN

| miRNA    | <u>Main Effect:</u><br>Treatment           | <u>Main Effect:</u><br>Age                 | <u>Interaction:</u><br>Treatment x Age    |
|----------|--------------------------------------------|--------------------------------------------|-------------------------------------------|
| Let-7i   | Yes<br>( $F(1,14)=11.987$ ,<br>$p=0.004$ ) | Yes<br>( $F(1,14)=22.550$ ,<br>$p<0.001$ ) | No                                        |
| miR-7a   | Yes<br>( $F(1,14)=4.810$ ,<br>$p=0.046$ )  | Yes<br>( $F(1,14)=6.065$ ,<br>$p=0.027$ )  | Yes<br>( $F(1,14)=4.498$ ,<br>$p=0.052$ ) |
| miR-9    | Yes<br>( $F(1,12)=7.869$ ,<br>$p=0.016$ )  | Yes<br>( $F(1,12)=4.921$ ,<br>$p=0.047$ )  | No                                        |
| miR-9-3p | No                                         | No                                         | No                                        |
| miR-125a | Yes<br>( $F(1,15)=17.335$ ,<br>$p<0.001$ ) | Yes<br>( $F(1,15)=7.823$ ,<br>$p=0.014$ )  | No                                        |
| miR-181a | No                                         | No                                         | No                                        |
| miR-495  | No                                         | No                                         | No                                        |

Supplemental Table 4. Statistical analysis of miRNA expression levels in the CeA

| miRNA    | <u>Main Effect:</u><br>Treatment          | <u>Main Effect:</u><br>Age                 | <u>Interaction:</u><br>Treatment x Age     |
|----------|-------------------------------------------|--------------------------------------------|--------------------------------------------|
| Let-7i   | No                                        | No                                         | No                                         |
| miR-7a   | No                                        | No                                         | Yes<br>( $F(1,15)=6.507$ ,<br>$p=0.022$ )  |
| miR-9    | Yes<br>( $F(1,15)=9.803$ ,<br>$p=0.007$ ) | Yes<br>( $F(1,15)=14.984$ ,<br>$p=0.002$ ) | Yes<br>( $F(1,15)=14.984$ ,<br>$p=0.030$ ) |
| miR-9-3p | No                                        | Yes<br>( $F(1,15)=12.148$ ,<br>$p=0.003$ ) | Yes<br>( $F(1,15)=10.738$ ,<br>$p=0.005$ ) |
| miR-125a | No                                        | No                                         | No                                         |
| miR-181a | No                                        | No                                         | No                                         |
| miR-495  | No                                        | Yes<br>( $F(1,15)=53.989$ ,<br>$p<0.001$ ) | No                                         |
